# Supplementary material for: Common regulatory control of CTP synthase enzyme activity and filament formation
Source: PubMed Central journal article supplement — Mol Biol Cell. 2014 Aug 1;25(15):2282–90. doi: 10.1091/mbc.E14-04-0912 (PMC4116302; doi:10.1091/mbc.e14-04-0912), 2014-08-01

# Supplemental Materials

*Molecular Biology of the Cell*

Noree et al.

Figure S1. Frequency and length of Ura7p-GFP structures (WT and mutants) are not correlated with their expression levels

A) Western blots of wild type (WT) and mutant Ura7p-GFP. B) Expression level versus frequency of structure formation of mutant Ura7p-GFP. C) Expression level versus median length of mutant Ura7p-GFP structures. Fold-change is calculated, relative to expression level, frequency, and length of wild type (WT) Ura7p-GFP.

Figure S2. Alignment of amino acid sequences translated from genes encoding CTP synthases in *H. sapiens*, *E. coli*, *D. Malanogaster*, *S. cerevisiae*, *L. lactis*, *T. thermophilus* (HB8).

The alignment shows that their sequences share 128 identical amino acids (19% identity, marked with stars), and 151 similar amino acids (marked with dots). Amino acids highlighted in grey are mutagenized in this study; ATP binding sites (D70A and E146A), CTP binding site (E161K), GTP binding sites (R381M/P and G382A), tetramerization site (G148A), catalytic site (C404G), phosphorylation sites (S36A, S330A, S354A, and S424A). Analysis was performed using program 'CLUSTAL O 1.2.1' ([www.uniprot.org](http://www.uniprot.org)).

Figure S3. Expression levels are not related to types of structures of E161K Ura7p-GFP

A) Western blots of wild type (WT), E161K (made in this study), and E161K Ura7p-GFP (integrated plasmid pRS403; described in Noree et al., 2010). B) Representative images of yeast expressing E161K Ura7p-GFP (this study versus our previous study).

**Supplementary Table 1. Summary for frequency of assembly, median length, and protein expression level of each mutant relative to those of WT (fold-change)**

| Mutants     | Fold change relative to WT |               |                  |
|-------------|----------------------------|---------------|------------------|
|             | Frequency of assembly      | Median Length | Expression level |
| WT          |                            |               |                  |
| E161K       | 3.84                       | 0.34          | 0.05             |
| E161K-C404G | 2.47                       | 0.33          | 0.41             |
| E146A       | 2.19                       | 1.16          | 6.85             |
| D70A        | 2.10                       | 0.85          | 5.45             |
| R381M       | 3.32                       | 1.33          | 1.86             |
| R381P       | 3.15                       | 1.15          | 2.83             |
| G382A       | 2.23                       | 0.75          | 2.49             |
| C404G       | 1.12                       | 0.98          | 2.09             |
| G148A       | 2.77                       | 1.11          | 0.60             |
| S330A       | 1.08                       | 0.84          | 5.08             |
| S354A       | 1.07                       | 0.73          | 4.96             |
| S424A       | 0.93                       | 0.84          | 5.03             |
| S36A        | 0.50                       | 0.85          | 3.22             |

**A**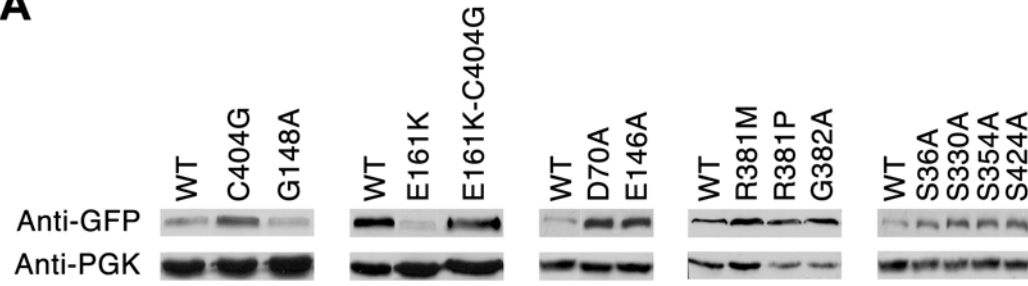**B**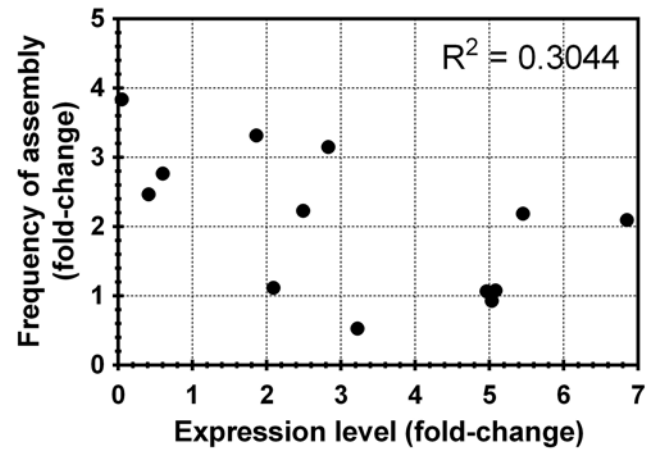**C**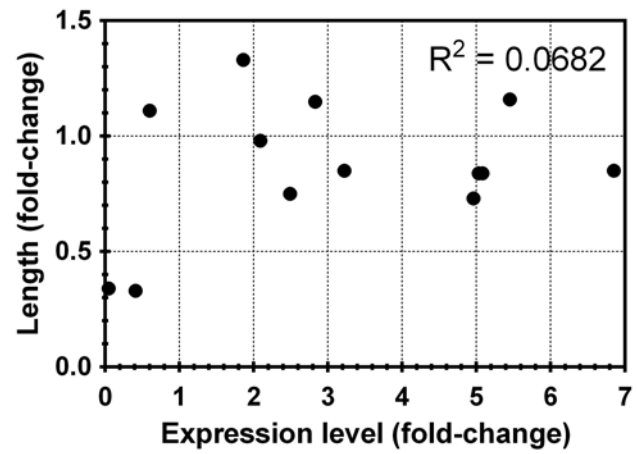

| Position | Amino Acid Sequence                                                                                        | Position | Accession no.          | Gene/Organism |
|----------|------------------------------------------------------------------------------------------------------------|----------|------------------------|---------------|
| 1        | -----MKYILVTGGVIGSGIGKGIASSVGTILKSCGLHVTSIKIDPYINIDAGTFSPYEHGEVFLDDGGVEVLDLGNVYERFLDIRLTKDNNLT             | 89       | <a href="#">P17812</a> | PYRG1_HUMAN   |
| 1        | -----MKYILVTGGVIGSGIGKGIASSVGTILKSCGLRVTAIKIDPYINIDAGTFSPYEHGEVFLDDGGVEVLDLGNVYERFLDIRLTKDNNIT             | 89       | <a href="#">Q9NRF8</a> | PYRG2_HUMAN   |
| 1        | -----MTNYIFVTGGVSSLGKIAAASLAALEARGLAVTIMKLDPIYINVDPTGMSPIQHGVEVVTEDGAEATDLDLGHYERFDIRTKMRRNNFT             | 91       | <a href="#">P0A7E5</a> | PYRG_ECOLI    |
| 1        | -----MKYILVTGGVIGSGIGKGIASSVGTILKSCGLDVTSIKIDPYINIDAGTFSPYEHGEVFLDDGGVEVLDLGNVYERFLDIRLTKDNNIT             | 89       | <a href="#">Q9VUL1</a> | PYRG_DROME    |
| 1        | -----MKYVVVSGGVIIGIGKGLVASSGTMMLKTLGLKVTIKIDPYMNIIDAGTMSPLHGEVFLDDGGVEVLDLGNVYERFLDIRLTKDNNIT              | 89       | <a href="#">P28274</a> | URA7_YEAST    |
| 1        | -----MKYVVVSGGVIIGIGKGLVASSGTMMLKTLGLKVTIKIDPYMNIIDAGTMSPLHGEVFLDDGGVEVLDLGNVYERFLDIRLTKDNNIT              | 89       | <a href="#">P38627</a> | URA8_YEAST    |
| 1        | -----MSTKYIFVTGGVSSMGKIVAAASLGRLLKNRGLKVTIQKFDPIYINVDPTGMSPIQHGVEVVTEDGAEATDLDLGHYERFDIRTKMRRNNFT          | 91       | <a href="#">O87761</a> | PYRG_LAACLAM  |
| 1        | MNGSADAGPRPKYVFIITGGVSSLGKILTSGLGALLRARGYVTAIKIDPYVNVVAGTMRPYEHGEVFLDDGGVEVLDLGNVYERFLDIRLTKDNNLT          | 100      | <a href="#">Q5S1A8</a> | PYRG_THET8    |
|          | :*: :*: :*: :*: :*: :*: :*: :*: :*: :*: :*: :*: :*: :*: :*: :*: :*: :*: :*: :*: :*: :*: :*: :*: :*: :* :*  |          |                        |               |
| 90       | TGKIYQVINKERKGDYLGKTVQVPHITDAIQEWVVRQALIPVDEGLEPQVCVIELGGTVGDIEMSPFIEAFRQFQFKVRENFNCNHHVSLVQPSSST          | 189      | <a href="#">P17812</a> | PYRG1_HUMAN   |
| 90       | TGKIYQVINKERKGDYLGKTVQVPHITDAIQEWVVRQALIPVDEGLEPQVCVIELGGTVGDIEMSPFIEAFRQFQFKVRENFNCNHHVSLVQPSAT           | 189      | <a href="#">Q9NRF8</a> | PYRG2_HUMAN   |
| 92       | TGRIVSDVLRKERRGDYLGKTVQVPHITDAIQEWVVRQALIPVDEGLEPQVCVIELGGTVGDIEMSPFIEAFRQFQFKVRENFNCNHHVSLVQPSAT          | 183      | <a href="#">P0A7E5</a> | PYRG_ECOLI    |
| 90       | TGKIYKLVIEKERTGEYLGKTVQVPHITDAIQEWVVRQALIPVDEGLEPQVCVIELGGTVGDIEMSPFIEAFRQFQFKVRENFNCNHHVSLVQPSAT          | 188      | <a href="#">Q9VUL1</a> | PYRG_DROME    |
| 90       | TGKIYSHVIAKERKGDYLGKTVQVPHITDAIQEWVVRQALIPVDEGLEPQVCVIELGGTVGDIEMSPFIEAFRQFQFKVRENFNCNHHVSLVQPSAT          | 187      | <a href="#">P28274</a> | URA7_YEAST    |
| 90       | TGKIYSHVIAKERKGDYLGKTVQVPHITDAIQEWVVRQALIPVDEGLEPQVCVIELGGTVGDIEMSPFIEAFRQFQFKVRENFNCNHHVSLVQPSAT          | 187      | <a href="#">P38627</a> | URA8_YEAST    |
| 92       | SGKVVSEILRKRKKEGELGTVQVPHITDAIQEWVVRQALIPVDEGLEPQVCVIELGGTVGDIEMSPFIEAFRQFQFKVRENFNCNHHVSLVQPSAT           | 185      | <a href="#">O87761</a> | PYRG_LAACLAM  |
| 101      | TGQVLSVIQKERRGEYLGKTVQVPHITDAIQEWVVRQALIPVDEGLEPQVCVIELGGTVGDIEMSPFIEAFRQFQFKVRENFNCNHHVSLVQPSAT           | 194      | <a href="#">Q5S1A8</a> | PYRG_THET8    |
|          | :*: :*: :*: :*: :*: :*: :*: :*: :*: :*: :*: :*: :*: :*: :*: :*: :*: :*: :*: :*: :*: :*: :*: :*: :*: :* :*  |          |                        |               |
| 190      | GEQTKTQNSVRELRLGLSPDLVRCRNSPLDTSVKEIKSMPFCHVEPEQVICVHDVSSVYRPLLEEQQVVDYFLRLDLPI-----ERQPR-KML              | 282      | <a href="#">P17812</a> | PYRG1_HUMAN   |
| 190      | GEQTKTQNSVRELRLGLSPDLVRCRNSPLDTSVKEIKSMPFCHVNPQVICVHDVSSVYRPLLEEQQVVDYFLRLDLPI-----GDSAS-NLL               | 282      | <a href="#">Q9NRF8</a> | PYRG2_HUMAN   |
| 184      | GEVTKTKTQHSVVELLISGIDPDIICRSDDRAVNERAKIALFCNVPEKAVISLKDVSDEYIKIPLGLKSGQLDDYICKRFSLNCP-----EANL             | 273      | <a href="#">P0A7E5</a> | PYRG_ECOLI    |
| 189      | GEFKTKTQSSVRELRLGLSPDLVRCRNSPLDTSVKEIKSMPFCHVNPQVICVHDVSSVYRPLLEEQQVVDYFLRLDLPI-----DMSKRTKCL              | 282      | <a href="#">Q9VUL1</a> | PYRG_DROME    |
| 188      | GEQTKTQNSVRELRLGLSPDLVRCRNSPLDTSVKEIKSMPFCHVNPQVICVHDVSSVYRPLLEEQQVVDYFLRLDLPI-----LHARLKLDEISLTEEEKQGLLEL | 287      | <a href="#">P28274</a> | URA7_YEAST    |
| 188      | GEQTKTQNSVRELRLGLSPDLVRCRNSPLDTSVKEIKSMPFCHVNPQVICVHDVSSVYRPLLEEQQVVDYFLRLDLPI-----LHARLKLDEISLTEEEKQGLLEL | 287      | <a href="#">P38627</a> | URA8_YEAST    |
| 186      | GELTKTQNSVRELRLGLSPDLVRCRNSPLDTSVKEIKSMPFCHVNPQVICVHDVSSVYRPLLEEQQVVDYFLRLDLPI-----KADM                    | 275      | <a href="#">O87761</a> | PYRG_LAACLAM  |
| 195      | EEFKTKTQNSVRELRLGLSPDLVRCRNSPLDTSVKEIKSMPFCHVNPQVICVHDVSSVYRPLLEEQQVVDYFLRLDLPI-----IPNL                   | 284      | <a href="#">Q5S1A8</a> | PYRG_THET8    |
|          | :*: :*: :*: :*: :*: :*: :*: :*: :*: :*: :*: :*: :*: :*: :*: :*: :*: :*: :*: :*: :*: :*: :*: :*: :*: :* :*  |          |                        |               |
| 283      | MKWKEMADRYDRLLTETSIALVGVKTYKSDSYASVIAKALEHSALAINHKLKIKYIDSADLEPITSQEEPVRYHEAWQKCSAHGVLVFGGFGVGRGTEGI       | 382      | <a href="#">P17812</a> | PYRG1_HUMAN   |
| 283      | FKWNRMDRYDRLLTETSIALVGVKTYKSDSYASVIAKALEHSALAINHKLKIKYIDSADLEPITSQEEPVRYHEAWQKCSAHGVLVFGGFGVGRGTEGI        | 382      | <a href="#">Q9NRF8</a> | PYRG2_HUMAN   |
| 274      | SEHQVIFEEANVSEVTTIGMVGKVIELPDYAKSVIEALKHGGLKNRVSVNLIKIDSDQVTRGV-----EILKGLDAIILVFGGFGYGRGVEGMI             | 362      | <a href="#">P0A7E5</a> | PYRG_ECOLI    |
| 283      | QQRDLARTEVTRVEICVAVGVKTYKSDSYASVIAKALEHSALAINHKLKIKYIDSADLEPITSQEEPVRYHEAWQKCSAHGVLVFGGFGVGRGTEGI          | 382      | <a href="#">Q9VUL1</a> | PYRG_DROME    |
| 288      | SKWKATTGFDNEMETKIALVGVKTYKSDSYASVIAKALEHSALAINHKLKIKYIDSADLEPITSQEEPVRYHEAWQKCSAHGVLVFGGFGVGRGTEGI         | 387      | <a href="#">P28274</a> | URA7_YEAST    |
| 288      | TNWNMTKNDSDSDVVKIALVGVKTYKSDSYASVIAKALEHSALAINHKLKIKYIDSADLEPITSQEEPVRYHEAWQKCSAHGVLVFGGFGVGRGTEGI         | 387      | <a href="#">P38627</a> | URA8_YEAST    |
| 276      | AEWSAMVDHVMNMLKVKYIALVGVKTYKSDSYASVIAKALEHSALAINHKLKIKYIDSADLEPITSQEEPVRYHEAWQKCSAHGVLVFGGFGVGRGTEGI       | 365      | <a href="#">O87761</a> | PYRG_LAACLAM  |
| 285      | SPWQEAERVLLKHPERTKIALVGVKTYKSDSYASVIAKALEHSALAINHKLKIKYIDSADLEPITSQEEPVRYHEAWQKCSAHGVLVFGGFGVGRGTEGI       | 374      | <a href="#">Q5S1A8</a> | PYRG_THET8    |
|          | :*: :*: :*: :*: :*: :*: :*: :*: :*: :*: :*: :*: :*: :*: :*: :*: :*: :*: :*: :*: :*: :*: :*: :*: :*: :* :*  |          |                        |               |
| 383      | QAIWARNQKPKPFLGVLGMQLAVVFSRNVLWGDANSTEFDPDT-----SHPVVVDMPEH-----NPGQMGTMRLGKRRTLFQTK--NSVMR                | 465      | <a href="#">P17812</a> | PYRG1_HUMAN   |
| 383      | QAIWARNQKPKPFLGVLGMQLAVVFSRNVLWGDANSTEFDPDT-----PVPLVIDMPEH-----NPNLGGTMRLGKRRTLFQTK--NSILR                | 465      | <a href="#">Q9NRF8</a> | PYRG2_HUMAN   |
| 363      | TTARFARENNIPYVLGICLGMQVALIDYARHVNMMENANSTEFVDPD-----KYPVVALITFWRDENGNEVRSSEKSDLGTMRLGQCCQLVDD--SLVR        | 455      | <a href="#">P0A7E5</a> | PYRG_ECOLI    |
| 383      | RACQWARENQKPKPFLGVLGMQLAVVFSRNVLWGDANSTEFDPDT-----ANALVIDMPEH-----HTQQLGTMRLGKRRTLFQTK--PSVIR              | 465      | <a href="#">Q9VUL1</a> | PYRG_DROME    |
| 388      | LAARWARENHIPPFLGVLGMQVALIDYARHVNMMENANSTEFVDPD-----IDKHNHVVFMPEI-----DKETMGSMRLGLRPTFPQNETEWSQIK           | 474      | <a href="#">P28274</a> | URA7_YEAST    |
| 388      | LAARWARENHIPPFLGVLGMQVALIDYARHVNMMENANSTEFVDPD-----DKEHMGTMRLGKRRTLFQTK--PQNSWENIR                         | 476      | <a href="#">P38627</a> | URA8_YEAST    |
| 366      | AAIKYARENVDVPMGLGICLGMQVALIDYARHVNMMENANSTEFVDPD-----KYPVIDIMRQV-----DVEDMGTMRLGKRLGKRTLFQTK--SRAK         | 448      | <a href="#">O87761</a> | PYRG_LAACLAM  |
| 375      | RAAQYAREKIPYVLGICLGMQVALIDYARHVNMMENANSTEFDPDT-----PHPVIDIMPEQL-----EVEGLGTMRLGKRWPMRIFKPG--TLRH           | 457      | <a href="#">Q5S1A8</a> | PYRG_THET8    |
|          | :*: :*: :*: :*: :*: :*: :*: :*: :*: :*: :*: :*: :*: :*: :*: :*: :*: :*: :*: :*: :*: :*: :*: :*: :*: :* :*  |          |                        |               |
| 466      | KLYGDADYLEERHRRFVFNPNVWKKCLEEQGLKFGVQ-----DVEGERMEI VELEDHPFFVGVQYHPEFLSRPIKPSPPYFGLLLASVGRLSHYLQKGR       | 560      | <a href="#">P17812</a> | PYRG1_HUMAN   |
| 466      | KLYGDADYLEERHRRFVFNPNVWKKCLEEQGLKFGVQ-----DVGDRMEI IELANHPYFVGVQYHPEFLSRPIKPSPPYFGLLLASVGRLSHYLQKGR        | 560      | <a href="#">Q9NRF8</a> | PYRG2_HUMAN   |
| 456      | QLYNAPTIV-ERHRRHRYEVNPNMLLQIEDAGLRVAGR-----SGDDQVLEI I EVPNHPFVACQHPPEPTSTPRDGHPLFAGFVKAASEFQKQKAK----     | 545      | <a href="#">P0A7E5</a> | PYRG_ECOLI    |
| 466      | QLYGPKPSQERHRRHRYEVNPNVWKKCLEEQGLKFGVQ-----DVKTRMEI I ELSGHPYFVATQYHPEFLSRPIKPSPPYFGLLLASVGRLSHYLQKGR      | 560      | <a href="#">Q9VUL1</a> | PYRG_DROME    |
| 475      | KLYGDVSEVHERHRRHRYEVNPNVWKKCLEEQGLKFGVQ-----DDTKRCEI I ELKHPHYFVATQYHPEFLSRPIKPSPPYFGLLLASVGRLSHYLQKGR     | 569      | <a href="#">P28274</a> | URA7_YEAST    |
| 477      | KLYGEVNEVHERHRRHRYEVNPNVWKKCLEEQGLKFGVQ-----DETQRCCEI FELKHPHYFVATQYHPEFLSRPIKPSPPYFGLLLASVGRLSHYLQKGR     | 571      | <a href="#">P38627</a> | URA8_YEAST    |
| 449      | AAYNDAEVVQRHRRHRYEVNPNVWKKCLEEQGLKFGVQ-----SPDNRLVEI I VELSGLKFFVACQYHPEFLSRPIKPSPPYFGLLLASVGRLSHYLQKGR    | 535      | <a href="#">O87761</a> | PYRG_LAACLAM  |
| 458      | RLYGKEEVL-ERHRRHRYEVNPNVWKKCLEEQGLKFGVQ-----TPGMRGRGAGLVEAIELKDHPPFLGQLQSHPEKSRPMRSPPPYFGLLLASVGRLSHYLQKGR | 550      | <a href="#">Q5S1A8</a> | PYRG_THET8    |
|          | :*: :*: :*: :*: :*: :*: :*: :*: :*: :*: :*: :*: :*: :*: :*: :*: :*: :*: :*: :*: :*: :*: :*: :*: :*: :* :*  |          |                        |               |
| 561      | LSPRDYSRSGSSSPDS-----EITELKFPNSINH-----                                                                    | 591      | <a href="#">P17812</a> | PYRG1_HUMAN   |
| 561      | LSSSDRYSDASDDSFSEP-----RIALELIS-----                                                                       | 586      | <a href="#">Q9NRF8</a> | PYRG2_HUMAN   |
| 546      | -----                                                                                                      | 545      | <a href="#">P0A7E5</a> | PYRG_ECOLI    |
| 561      | LSPRQLDASDDEEDSVVGLAGATKLSLSPKIPITPTNGISKSCNGSISTSDSEGACGVDPPTNGHK                                         | 627      | <a href="#">Q9VUL1</a> | PYRG_DROME    |
| 570      | LEAGENK-----FNF-----                                                                                       | 579      | <a href="#">P28274</a> | URA7_YEAST    |
| 572      | SEGGENE-----                                                                                               | 578      | <a href="#">P38627</a> | URA8_YEAST    |
| 536      | -----                                                                                                      | 535      | <a href="#">O87761</a> | PYRG_LAACLAM  |
| 551      | -----                                                                                                      | 550      | <a href="#">Q5S1A8</a> | PYRG_THET8    |

A

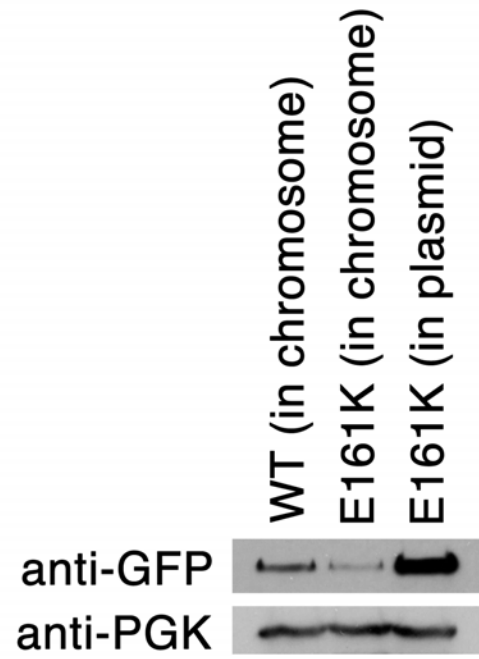

B

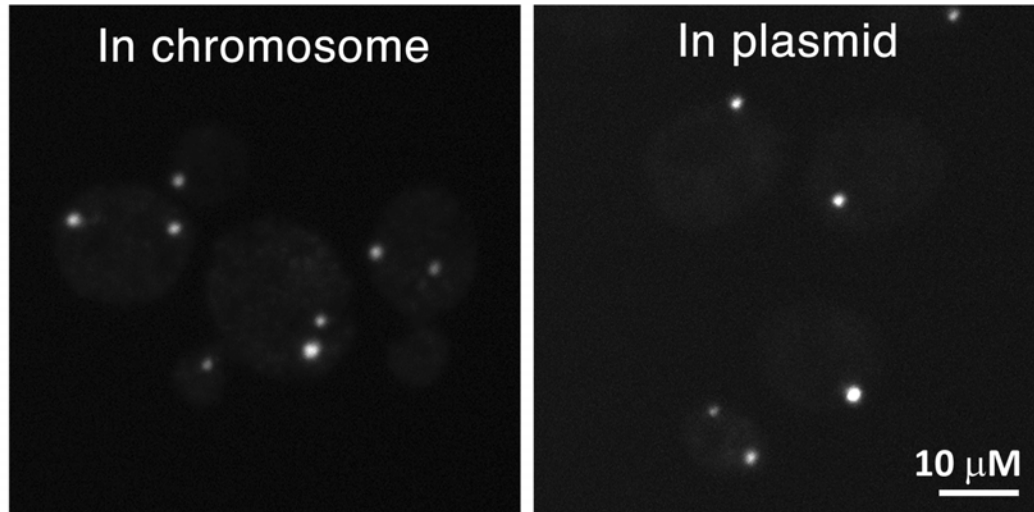

Supplement: supp_E14-04-0912v1_CombinedSupMats.pdf [file supp_E14-04-0912v1_CombinedSupMats.pdf]
